# Supplementary material for: Design and synthesis of one-dimensional Co3O4/Co3V2O8 hybrid nanowires with improved Li-storage properties
Source: Royal Society of Chemistry journal article supplement (doi:10.1039/c6ra02502a), 2016-01-01
Supplement: c6ra02502a1.pdf [file c6ra02502a1.pdf]

## Electronic Supplementary Information

### **Design and synthesis of one-dimensional $\text{Co}_3\text{O}_4/\text{Co}_3\text{V}_2\text{O}_8$ hybrid nanowires with improved Li-storage properties**

Yang Li<sup>a</sup>, Long Kang<sup>a,b,\*</sup>, Ling-Bin Kong<sup>a,b,\*</sup>, Mao-Cheng Liu<sup>a,b</sup>, Xi-Xin Wang<sup>a</sup>, and Wei-Bin Zhang<sup>a</sup>

<sup>a</sup> *State Key Laboratory of Advanced Processing and Recycling of Non-ferrous Metals,  
Lanzhou University of Technology, Lanzhou 730050, P. R. China*

<sup>b</sup> *School of Materials Science and Engineering, Lanzhou University of Technology, Lanzhou  
730050, P. R. China*

\* Corresponding author. Tel.: +86-931-2976579, Fax: +86-931-2976578,

E-mail: kangl@lut.cn, konglb@lut.cn

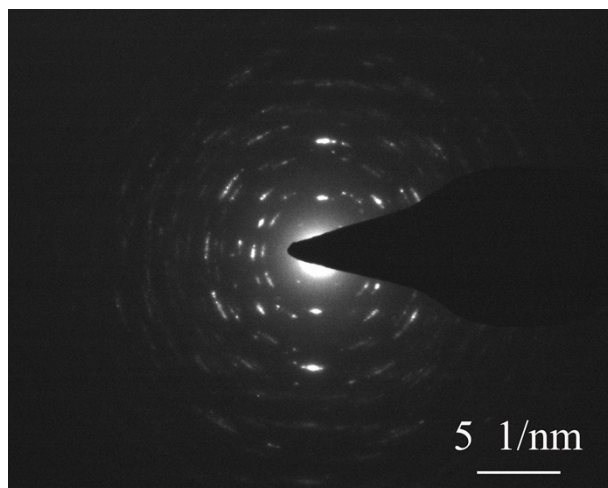

**Fig. S1.** Selected Area Electron Diffraction (SAED) pattern of  $\text{Co}_3\text{O}_4/\text{Co}_3\text{V}_2\text{O}_8$  hybrid nanowires.

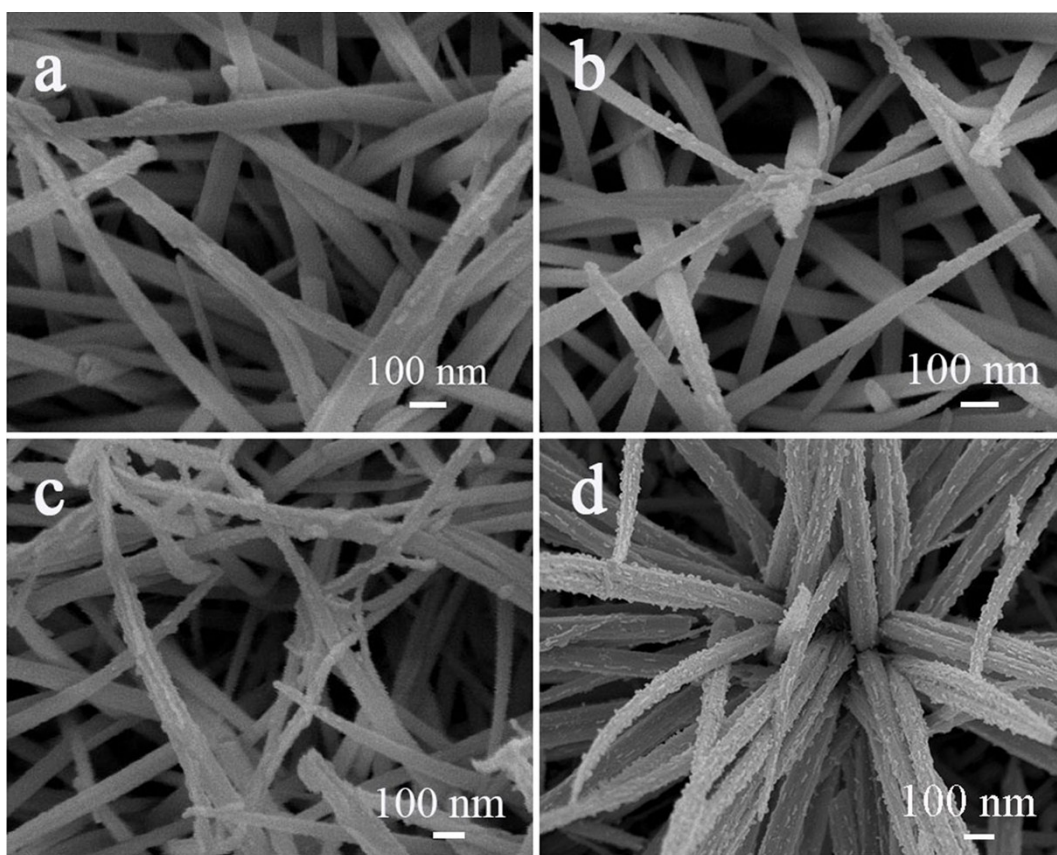

**Fig. S2.** SEM images of  $\text{Co}_3\text{O}_4/\text{Co}_3\text{V}_2\text{O}_8$  hybrid nanowires with different reaction times: (a) 0.5 h, (b) 1 h, (c) 2 h, (d) 6 h.

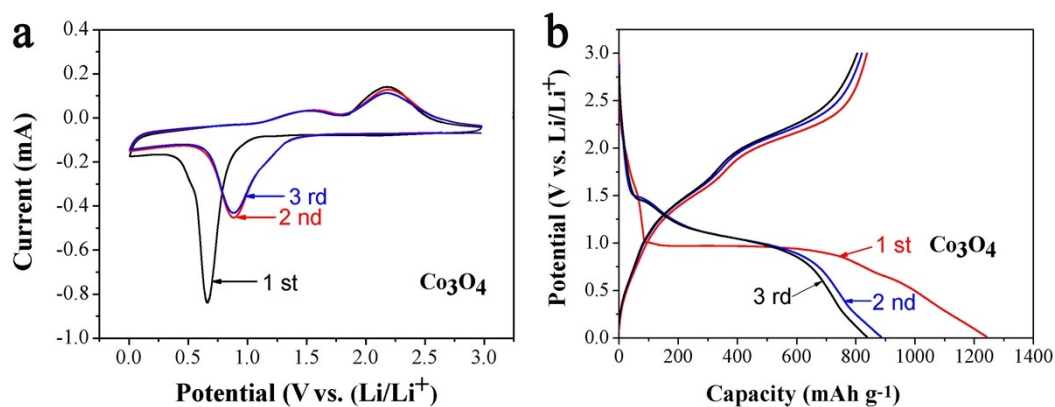

**Fig. S3.** (a) CV curves of  $\text{Co}_3\text{O}_4$  nanowires for the first three cycles; (b) the charge-discharge profiles of  $\text{Co}_3\text{O}_4$  nanowires.

**Table S1.** The comparison of the electrochemical performance of  $\text{Co}_3\text{O}_4/\text{Co}_3\text{V}_2\text{O}_8$  hybrid nanowires with the reported results.

| Nanomaterials                                                                                  | Current density<br>( $\text{mA g}^{-1}$ ) | Cycle<br>Number | Capacity<br>( $\text{mAh g}^{-1}$ ) | Referenc<br>e |
|------------------------------------------------------------------------------------------------|-------------------------------------------|-----------------|-------------------------------------|---------------|
| Foam-like freestanding $\text{Co}_3\text{O}_4$ nanosheets                                      | 150                                       | 50              | 631                                 | [5]           |
| Porous $\text{Co}_3\text{O}_4/\text{CuO}$ composite                                            | 100                                       | 150             | 1151.2                              | [47]          |
| Hierarchical $\text{Fe}_2\text{O}_3@\text{Co}_3\text{O}_4$ nanowire array                      | 200                                       | 50              | 1005.1                              | [48]          |
| $\text{NiO-Co}_3\text{O}_4$ nanoplate composite                                                | 100                                       | 70              | 663                                 | [26]          |
| Branched $\text{Co}_3\text{O}_4/\text{Fe}_2\text{O}_3$ nanowires                               | 100                                       | 60              | 980                                 | [46]          |
| $\text{Co}_3\text{O}_4/\text{TiO}_2$ hierarchical heterostructures                             | 200                                       | 480             | 632.5                               | [49]          |
| $\text{Co}_3\text{O}_4/\text{SnO}_2$ hollow nano-spheres                                       | 100                                       | 100             | 962                                 | [28]          |
| $\text{Li}_4\text{Ti}_5\text{O}_{12}/\text{Co}_3\text{O}_4$ composite                          | 160                                       | 50              | 300                                 | [27]          |
| $\text{Co}_3\text{V}_2\text{O}_8$ multilayered nanosheets                                      | 1000                                      | 100             | 1114                                | [34]          |
| $\text{Co}_3\text{V}_2\text{O}_8 \cdot n\text{H}_2\text{O}$ hollow hexagonal prismatic pencils | 500                                       | 225             | 847                                 | [35]          |
| $\text{Co}_3\text{O}_4/\text{Co}_3\text{V}_2\text{O}_8$ hybrid nanowires                       | 200                                       | 200             | 1251                                | This work     |
